# Supplementary material for: Alpha-Ketoglutarate Promotes Goblet Cell Differentiation and Alters Urea Cycle Metabolites in DSS-Induced Colitis Mice
Source: MDPI journal article supplement (doi:10.3390/nu14061148), 2022-03-09
Supplement: s1 [file s1]

# Supplementary Materials

**Table S1.** Primer sequences used for qRT-PCR analyses.

| Gene name      | Accession No. | Product size | Sequence (5'→3')                                      | Source     |
|----------------|---------------|--------------|-------------------------------------------------------|------------|
| <i>Hes1</i>    | NM_008235.2   | 86 bp        | F: CAACACGACACCGGACAAAC<br>R: TTCTTGCCCTTCGCCTCTTC    | [1]        |
| <i>Klf4</i>    | NM_010637.3   | 75 bp        | F: CAGGATTCCATCCCCATCCG<br>R: GAGAGGGACTTGTGACTGC     | [2]        |
| <i>Muc2</i>    | NM_023566.2   | 101 bp       | F: ATGCCCACCTCCTCAAAGAC<br>R: GTAGTTTCCGTTGGAACAGTGAA | [2]        |
| <i>Notch1</i>  | NM_008714.3   | 268 bp       | F: GCTCCGAGGAGATCAACGAG<br>R: TTGACATCACCTCACACCG     | This study |
| <i>Tff3</i>    | NM_011575.2   | 103 bp       | F: CTGTCACATCGGAGCCAGTGT<br>R: AATGTGCATTCTGTCTCCTGC  | [2]        |
| <i>18S RNA</i> | NM_003278.1   | 122 bp       | F: AAGACGGACCAGAGCGAAAG<br>R: ATCGCCAGTCGGCATCGTTT    | [2]        |

## References

1. Sun, X.; Du, M.; Navarre, D.A.; Zhu, M.-J. Purple potato extract promotes intestinal epithelial differentiation and barrier function by activating AMP-activated protein kinase. *Mol Nutr Food Res* **2018**, *62*, 1700536, doi:10.1002/mnfr.201700536.
2. Bibi, S.; de Sousa Moraes, L.F.; Lebow, N.; Zhu, M.J. Dietary green pea protects against DSS-induced colitis in mice challenged with high-fat diet. *Nutrients* **2017**, *9*, 509, doi:10.3390/nu9050509.
